# Supplementary material for: Antimicrobial Characterization of<em> Bacillus cereus </em>Group Strains Isolated from Different Food Sources in Apulia and Basilicata Regions
Source: Preprints.org preprint supplement (doi:10.20944/preprints202406.1886.v1), 2024-06-27
Supplement: Supplementary file 1 [file supplementary]

**Table S1.** ID strains, species of *B. cereus* group and source of isolation.

| ID Strain | Bacterial Species           | Source                        |                      |
|-----------|-----------------------------|-------------------------------|----------------------|
| BC2D      | <i>B. cereus</i> E33L       | Mozzarella                    | Dairy products       |
| BC4C      | <i>B. cereus</i> 03BB102    | Buffalo Mozzarella            |                      |
| BC5B      | <i>B. cereus</i> ATCC 10876 | Burrata                       |                      |
| BC91C     | <i>B. cereus</i> Rock1 15   | Yogurt                        |                      |
| BC126B    | <i>B. cereus</i> AH187      | Caciocotta                    |                      |
| BC143A    | <i>B. cereus</i> F          | Butter                        |                      |
| BC182A    | <i>B. cereus</i> E33L       | Ricotta                       |                      |
| BC185A    | <i>B. cereus</i> ATCC 10876 | Bulk milk                     |                      |
| BC9A      | <i>B. cereus</i> ATCC 10876 | Pasteurized milk              |                      |
| BC41A     | <i>B. cereus</i> 172560W    | Bulk milk                     |                      |
| BC56B     | <i>B. cereus</i> 172560W    | Packaged ice cream            |                      |
| BC84A     | <i>B. cereus</i> ATCC 10876 | Mozzarella                    |                      |
| BC85A     | <i>B. cereus</i> 172560W    | Mozzarella                    |                      |
| BC99A     | <i>B. cereus</i> 172560W    | Mozzarella                    |                      |
| BC123A    | <i>B. cereus</i> 172560W    | Junket                        |                      |
| BC128B    | <i>B. cereus</i> 172560W    | Scamorza                      |                      |
| BC138A    | <i>B. cereus</i> AH187      | Quark                         |                      |
| BC156C    | <i>B. cereus</i> 172560W    | Semi-cured cheese             |                      |
| BC166A    | <i>B. cereus</i> CI         | Mozzarella                    |                      |
| BC178A    | <i>B. cereus</i> 172560W    | Quark                         |                      |
| BC171B    | <i>B. cereus</i> 172560W    | Mozzarella                    |                      |
| BC194C    | <i>B. cereus</i> Rock1 15   | Ice cream                     |                      |
| BC209C    | <i>B. cereus</i> ATCC 10876 | Sheep's milk cheese           |                      |
| BC221A    | <i>B. cereus</i> 172560W    | Caciotta                      |                      |
| BC223B    | <i>B. cereus</i> 172560W    | Mozzarella                    |                      |
| BC224B    | <i>B. cereus</i> 172560W    | Mozzarella                    |                      |
| BC226A    | <i>B. cereus</i> CI         | Mozzarella                    |                      |
| BC238B    | <i>B. cereus</i> CI         | Caciocavallo                  |                      |
| BC245A    | <i>B. cereus</i> F          | Caciocavallo                  |                      |
| BC263A    | <i>B. cereus</i> F          | Mozzarella                    |                      |
| BC290A    | <i>B. cereus</i> F          | Mozzarella                    |                      |
| BC293A    | <i>B. cereus</i> E33L       | Sheep's milk cure cheese      |                      |
| BC151A    | <i>B. cereus</i> 172560W    | Stretched cheese              |                      |
| BC246A    | <i>B. cereus</i> 172560W    | Caciocavallo                  |                      |
| BC254A    | <i>B. cereus</i> CI         | Mozzarella                    |                      |
| BC258A    | <i>B. cereus</i> Rock1_15   | Scamorza                      |                      |
| BC266A    | <i>B. cereus</i> 172560W    | Caciocavallo                  |                      |
| BC281A    | <i>B. cereus</i> F          | Bulk milk                     | Fruit and vegetables |
| BC287A    | <i>B. cereus</i> ATCC10987  | Mozzarella                    |                      |
| BC294A    | <i>B. cereus</i> AH187      | Mozzarella                    |                      |
| BC384A    | <i>B. cereus</i> AH187      | Pistachio ice cream           |                      |
| BC391A    | <i>B. cereus</i> Rock1_15   | Cream and chocolate ice cream |                      |
| BC331B    | <i>B. cereus</i> F          | Carosello                     |                      |
| BC335A    | <i>B. cereus</i> 172560W    | Cabbage                       |                      |
| BC348A    | <i>B. cereus</i> AH187      | Carosello                     |                      |
| BC355A    | <i>B. cereus</i> 172560W    | Green beans                   |                      |
| BC357B    | <i>B. cereus</i> AH187      | Melon                         |                      |
| BC359A    | <i>B. cereus</i> 03BB102    | Salad                         |                      |
| BC429A    | <i>B. cereus</i> F          | Truffle                       |                      |
| BC317C    | <i>B. cereus</i> 172560W    | Chicory                       |                      |
| BC313A    | <i>B. cereus</i> 172560W    | Beans                         |                      |

|        |                                  |                          |                      |
|--------|----------------------------------|--------------------------|----------------------|
| BC329A | <i>B. cereus</i> 172560W         | Fennel                   |                      |
| BC330A | <i>B. cereus</i> E33L            | Salad                    |                      |
| BC425A | <i>B. cereus</i> ATCC_10876      | Panettone                | Bakery products      |
| BC398C | <i>B. cereus</i> E33L            | Cookies                  |                      |
| BC400A | <i>B. cereus</i> 172560W         | Cookies                  |                      |
| BC407A | <i>B. cereus</i> 03BB102         | Cookies                  |                      |
| BC407C | <i>B. cereus</i> CI              | Cookies                  |                      |
| BC160B | <i>B. cereus</i> CI              | Soft wheat flour         |                      |
| BC161A | <i>B. cereus</i> m1293           | Soft wheat flour         |                      |
| BC416A | <i>B. cereus</i> AH187           | Sea bass                 | Fish                 |
| BC195A | <i>B. cereus</i> AH187           | Mixed seafood            |                      |
| BC55A  | <i>B. cereus</i> m1293           | Anchovies in olive oil   |                      |
| BC25B  | <i>B. cereus</i> 172560W         | Fresh sausage            | Meat                 |
| BC70A  | <i>B. cereus</i> ATCC 10876      | Beef                     |                      |
| BC414B | <i>B. cereus</i> AH187           | Russian salad            | Mixed products       |
| BC179A | <i>B. cereus</i> 172560W         | Focaccia with scamorza   |                      |
| BC187A | <i>B. cereus</i> 172560W         | Sandwich with cured meat |                      |
| BC1A   | <i>B. thuringensis</i> T13001    | Mozzarella               | Dairy products       |
| BC8B   | <i>B. thuringensis</i> BGSC 4AW1 | Raw cow's milk           |                      |
| BC8D   | <i>B. thuringensis</i> BGSC 4CC1 | Raw cow's milk           |                      |
| BC77A  | <i>B. thuringensis</i> T03a001   | Butter                   |                      |
| BC147A | <i>B. thuringensis</i> YBT 020   | Milk ice cream           |                      |
| BC264B | <i>B. thuringensis</i> 97 27     | Mozzarella               |                      |
| BC2A   | <i>B. thuringensis</i> T13001    | Mozzarella               |                      |
| BC4D   | <i>B. thuringensis</i> T13001    | Buffalo Mozzarella       |                      |
| BC23B  | <i>B. thuringensis</i> T13001    | Mozzarella               |                      |
| BC81B  | <i>B. thuringensis</i> T13001    | Mozzarella               |                      |
| BC83B  | <i>B. thuringensis</i> T13001    | Mozzarella               |                      |
| BC124B | <i>B. thuringensis</i> T03a001   | Primo sale cheese        |                      |
| BC234A | <i>B. thuringensis</i> T03a001   | Mozzarella               |                      |
| BC262A | <i>B. thuringensis</i> BGSC 4Y1  | Mozzarella               |                      |
| BC312B | <i>B. thuringensis</i> T13001    | Ricotta                  |                      |
| BC282A | <i>B. thuringensis</i> YBT_020   | Mozzarella               |                      |
| BC211A | <i>B. thuringensis</i> HD 29     | Rocket                   | Fruit and vegetables |
| BC324A | <i>B. thuringensis</i> BGSC_4BD1 | Artichokes               |                      |
| BC337A | <i>B. thuringensis</i> BGSC_4BD1 | Artichokes               | Bakery products      |
| BC398A | <i>B. thuringensis</i> T13001    | Cookies                  |                      |
| BC404A | <i>B. thuringensis</i> T13001    | Cookies                  | Fish                 |
| BC140A | <i>B. thuringensis</i> BGSC 4Y1  | Swordfish with olives    |                      |
| BC92B  | <i>B. thuringensis</i> HD 29     | Sausage                  | Meat                 |
| BC1B   | <i>B. wiedmannii</i> FSL W8 0169 | Mozzarella               | Dairy products       |
| BC4E   | <i>B. wiedmannii</i> FSL W8 0169 | Buffalo Mozzarella       |                      |
| BC36A  | <i>B. wiedmannii</i> FSL W8 0169 | Caciocavallo             |                      |
| BC130C | <i>B. wiedmannii</i> FSL W8 0169 | Mozzarella               |                      |
| BC131A | <i>B. wiedmannii</i> FSL W8 0169 | Mozzarella               |                      |
| BC183A | <i>B. wiedmannii</i> FSL W8 0169 | Ricotta                  |                      |
| BC204A | <i>B. wiedmannii</i> FSL W8 0169 | Scamorza                 |                      |
| BC222A | <i>B. wiedmannii</i> FSL W8 0169 | Mozzarella               |                      |
| BC239A | <i>B. wiedmannii</i> FSL W8 0169 | Mozzarella               |                      |
| BC259A | <i>B. wiedmannii</i> FSL W8 0169 | Ricotta                  |                      |
| BC93B  | <i>B. wiedmannii</i> FSL W8 0169 | Mozzarella               |                      |
| BC278A | <i>B. wiedmannii</i> FSL W8 0169 | Mozzarella               |                      |
| BC286A | <i>B. wiedmannii</i> FSL W8 0169 | Mozzarella               |                      |
| BC321A | <i>B. wiedmannii</i> FSL W8 0169 | Lettuce                  | Fruit and vegetables |
| BC399A | <i>B. wiedmannii</i> FSL W8 0169 | Wholemeal biscuits       | Bakery products      |
| BC243A | <i>B. wiedmannii</i> FSL W8 0169 | Cream horn               |                      |
| BC390A | <i>B. wiedmannii</i> FSL W8 0169 | Surimi                   | Fish                 |

|               |                                    |                    |                             |
|---------------|------------------------------------|--------------------|-----------------------------|
| <i>BC150A</i> | <i>B. wiedmannii FSL W8 0169</i>   | Sausage            | <b>Meat</b>                 |
| <i>BC375A</i> | <i>B. wiedmannii FSL W8 0169</i>   | Ravioli            | <b>Mixed products</b>       |
| <i>BC4A</i>   | <i>B. toyonensis BCT7112</i>       | Buffalo Mozzarella | <b>Dairy products</b>       |
| <i>BC127A</i> | <i>B. toyonensis BCT7112</i>       | Mozzarella         |                             |
| <i>BC275A</i> | <i>B. toyonensis BCT7112</i>       | Mozzarella         |                             |
| <i>BC320A</i> | <i>B. toyonensis BCT7112</i>       | Rocket             | <b>Fruit and vegetables</b> |
| <i>BC334A</i> | <i>B. toyonensis BCT7112</i>       | Salad              |                             |
| <i>BC212B</i> | <i>B. toyonensis BCT7112</i>       | Mixed salad        |                             |
| <i>BC423A</i> | <i>B. toyonensis BCT7112</i>       | Almond sweet       | <b>Bakery products</b>      |
| <i>BC78A</i>  | <i>B. weihenstephanensis KBAB4</i> | Mozzarella         | <b>Dairy products</b>       |
