# Supplementary material for: Antimicrobial Characterization of<em> Bacillus cereus </em>Group Strains Isolated from Different Food Sources in Apulia and Basilicata Regions
Source: Preprints.org preprint supplement (doi:10.20944/preprints202406.1886.v1), 2024-06-27
Supplement: Supplementary file 1 [file supplementary]

## Sheet: Supplementary Table 2
ID STRAIN	β-lactams							Fluoroquinolone	Macrolide			Chloramphenicol	Tetracycline	Clindamycin	Vancomicin
	bcI	bcII	bla	bla 1	bla2	bla P	blaZ-12	arlS	Bacillus_Cluster_A_intrinsic_mph	Bacillus_Cluster_B_intrinsic_mph	mph(B)	catA	tetL	lsaB	vanR	vanRA	vanRB	vanRF	vanRM	VanR-Pt	vanS	VanS-Pt2	vanW	vanYA	vanYF	vanY-Pt	vanZF
BC1A	·	·	·	·	·	·	·							·	·				·								·
BC1B		·	·	·	·		·								·				·								·
BC2A	·	·	·	·	·									·	·				·								·
BC2D			·	·	·				·		·				·				·								·
BC4A	·	·	·	·	·		·		·		·			·	·			·									·
BC4C			·	·	·				·		·				·	·			·	·	·	·			·	·	·
BC4D	·	·	·	·	·										·				·								·
BC4E		·	·	·	·		·					·			·				·								·
BC5B	·		·	·	·									·	·				·								·
BC8B			·	·	·				·		·			·	·				·								·
BC8D			·	·	·				·		·			·	·				·								·
BC9A	·		·	·	·		·							·	·		·		·								·
BC23B	·	·	·	·	·										·				·								·
BC25B	·	·	·	·	·	·	·		·		·		·	·	·	·			·	·	·	·		·		·	·
BC36A		·	·	·	·		·							·	·		·		·								·
BC41A	·	·	·	·	·	·	·		·		·		·	·	·			·									·
BC55A		·	·	·	·										·		·		·								·
BC56B	·	·	·	·	·	·	·		·		·		·	·	·				·								·
BC70A	·		·	·	·		·							·	·				·								·
BC77A	·		·	·	·		·							·	·				·								·
BC78A	·		·	·	·		·								·				·
BC81B	·	·	·	·	·	·	·							·	·				·								·
BC83B	·	·	·	·	·									·	·				·								·
BC84A	·		·	·	·									·	·				·								·
BC85A	·	·	·	·	·	·	·		·		·		·	·	·	·			·	·	·	·		·		·	·
BC91C	·	·	·	·	·										·				·								·
BC92B	·		·	·	·		·	·						·	·				·								·
BC93B	·	·	·	·	·	·	·		·		·				·				·								·
BC99A	·	·	·	·	·	·	·		·		·		·	·	·				·								·
BC123A	·	·	·	·	·	·	·		·		·		·	·	·				·								·
BC124A	·		·	·	·										·				·								·
BC126A		·	·	·	·										·				·
BC127A	·		·	·	·		·		·		·				·			·									·
BC128B	·	·	·	·	·	·	·		·		·		·	·	·			·									·
BC130C		·	·	·	·		·								·				·								·
BC131A	·	·	·	·	·	·	·								·	·			·	·	·	·			·	·	·
BC138A		·	·	·	·										·				·
BC140A		·	·	·	·										·	·			·	·	·	·			·	·	·
BC143A	·	·	·	·	·										·				·								·
BC147A		·	·	·	·				·		·				·				·								·
BC150A	·	·	·	·	·		·								·				·								·
BC156C	·	·	·	·	·	·	·		·		·		·	·	·				·								·
BC160B			·	·	·				·		·			·	·		·		·								·
BC161A		·	·	·	·				·		·				·				·
BC166A			·	·	·				·		·			·	·		·		·								·
BC178A	·	·	·	·	·										·				·								·
BC171A	·	·	·	·	·		·						·	·	·				·								·
BC179A	·	·	·	·	·	·	·		·		·		·	·	·				·								·
BC182A			·	·	·	·	·		·		·			·	·				·								·
BC183A	·	·	·	·	·	·									·	·			·	·				·	·	·	·
BC185A	·		·	·	·									·	·				·								·
BC187A	·	·	·	·	·	·	·		·		·		·	·	·				·								·
BC194C	·	·	·	·	·	·	·								·				·								·
BC195A		·	·	·	·										·				·
BC204A		·	·	·	·		·							·	·				·								·
BC209C	·		·	·	·									·	·				·								•
BC211A	·		·	·	·		·	·						·	·				·								•
BC212B	·	·	·	·	·		·		·		·			·	·			·									•
BC221A	·	·	·	·	·	·	·		·		·		·	·	·				·								•
BC222A		·	·	·	·		·					·			·				·								•
BC223B	·	·	·	·	·	·	·		·		·		·	·	·				·								•
BC224B	·		·	·	·	·	·						·	·	·				·								•
BC226A			·	·	·				·		·				·				·								•
BC234A	·		·	·											·				·								•
BC238B		·	·	·	·										·	·			·	·	·	·		·		·	•
BC239A	·	·	·	·	·		·								·				·								•
BC245A		·	·	·	·										·				·								•
BC259A		·	·	·	·		·								·				·								•
BC262A		·	·	·	·										·				·								•
BC263A		·	·	·	·										·				·								•
BC264B			·	·	·				·		·			·	·		·		·								•
BC290A		·	·	·	·								·		·				·								·
BC293A			·	·	·				·		·			·	·		·		·								·
BC312B	·	·	·	·	·									·	·				·								·
BC313A	·	·	·	·	·	·	·		·		·		·	·	·				·								·
BC329A	·	·	·	·	·	·	·		·		·		·	·	·				·								·
BC330A			·	·	·	·	·		·		·			·	·				·								·
BC151A	·		·	·	·		·							·	·				·								·
BC243A			·	·					·	·	·				·	·		·		·	·	·			·	·	·
BC246A	·	·	·	·	·	·	·		·		·		·	·	·			·									·
BC254A			·	·	·				·		·				·				·								·
BC258A	·	·	·	·	·										·				·								·
BC266A	·	·	·	·	·	·	·		·		·		·	·	·				·								·
BC275A	·	·	·	·	·		·		·	·	·			·	·			·									·
BC278A	·	·	·	·	·	·	·		·		·				·				·								·
BC281A		·	·	·	·								·		·				·								·
BC282A		·			·				·		·				·		·		·
BC286A		·	·	·	·				·		·				·				·								·
BC287A		·	·	·	·										·				·								·
BC294A		·	·	·	·										·				·
BC317C	·	·	·	·	·	·	·		·		·		·	·	·			·									·
BC320A	·		·	·	·		·		·	·	·				·			·									·
BC321A			·	·					·	·	·				·	·		·		·	·	·			·	·	·
BC324A	·	·	·	·	·	·	·		·		·		·	·	·	·			·	·	·	·		·		·	·
BC331B			·	·											·	·		·		·	·	·			·	·	·
BC334A	·	·	·	·	·		·		·		·			·	·			·									·
BC335A	·	·	·	·	·	·	·		·		·		·	·	·				·								·
BC337A	·	·	·	·	·		·		·		·		·	·	·	·			·	·	·	·		·		·	·
BC348A		·	·	·	·										·				·
BC355A	·	·	·	·	·	·	·		·		·		·	·	·			·									·
BC357B		·	·	·	·										·				·
BC359A		·			·				·		·				·				·								·
BC375A		·	·	·	·		·							·	·		·		·		·						·
BC384A		·	·	·	·										·				·
BC390A	·	·	·	·	·										·				·								·
BC391A	·	·	·	·	·										·				·								·
BC398A	·	·	·	·	·										·				·								·
BC398C			·	·	·				·		·				·				·								·
BC399A		·	·	·	·	·	·							·	·		·		·								·
BC400A	·		·	·	·		·							·	·	·			·	·	·	·		·	·	·	·
BC404A	·		·	·	·	·	·							·	·			·									·
BC407A		·	·	·	·				·		·				·	·			·	·	·	·			·	·	·
BC407C			·	·	·				·		·				·				·								·
BC414B		·	·	·	·										·				·
BC416A	·	·	·	·	·		·								·				·								·
BC423A	·	·	·	·	·		·		·		·			·	·			·									·
BC425A	·		·	·	·		·							·	·	·			·	·	·	·			·	·	·
BC429A		·	·	·	·										·			·
